# Supplementary material for: Self-adaptive structure and catalytic performance of the Pt–Sn/Al2O3 propane dehydrogenation catalyst regenerated by dichloroethane oxychlorination
Source: Royal Society of Chemistry journal article supplement (doi:10.1039/d2cy00921h), 2022-01-01
Supplement: d2cy00921h1.pdf [file d2cy00921h1.pdf]

## Supporting Information

### Self-adaptive structure and catalytic performance of the Pt-Sn/Al<sub>2</sub>O<sub>3</sub> propane dehydrogenation catalyst regenerated by dichloroethane oxychlorination

Fang-Cheng Zhao<sup>a</sup>, Huan Yang<sup>a</sup>, Zhi-Jun Sui<sup>a\*</sup>, Yi-An Zhu<sup>a</sup>, De Chen<sup>b</sup>, Xing-Gui Zhou<sup>a</sup>

<sup>a</sup> State Key Laboratory of Chemical Engineering, East China University of Science and Technology, 130 Meilong Road, Shanghai 200237, China. E-mail: zhjsui@ecust.edu.cn

<sup>b</sup> Department of Chemical Engineering, Norwegian University of Science and Technology, Trondheim 7491, Norway.

Table S1 The binding energy of Pt 4d<sub>5/2</sub>, relative contents of Pt species determined by XPS measurements.

| Samples       | Bind Energy(eV) Pt 4d <sub>5/2</sub> |                 |                 |
|---------------|--------------------------------------|-----------------|-----------------|
|               | metallic Pt                          | Oxidized Pt(II) | Oxidized Pt(IV) |
| Fresh-0Sn     | 312.2 (29.7%) <sup>a</sup>           | 315.2 (49.1%)   | 317.3 (21.2%)   |
| Fresh-0.03Sn  | 312.9 (17.8%)                        | 314.5 (48.8%)   | 316.9 (33.4%)   |
| Fresh-0.13Sn  | 311.3 (29.7%)                        | 314.4 (45.4%)   | 317.0 (24.9%)   |
| Fresh-0.54Sn  | 312.7 (35.1%)                        | 315.2 (38.1%)   | 317.1 (26.8%)   |
| Sinter-0Sn    | 313.2 (26.0%)                        | 315.8 (35.2%)   | 318.4 (38.7%)   |
| Sinter-0.03Sn | 312.2 (23.6%)                        | 314.9 (51.2%)   | 316.9 (25.2%)   |
| Sinter-0.13Sn | 313.0 (25.5%)                        | 315.6 (47.7%)   | 317.2 (26.8%)   |
| Sinter-0.54Sn | 313.2 (16.9%)                        | 315.3 (32.1%)   | 317.4 (51.0%)   |
| Re-0Sn        | 312.1 (20.9%)                        | 314.3 (59.2%)   | 316.3 (19.9%)   |
| Re-0.03Sn     | 313.0 (25.2%)                        | 315.3 (42.9%)   | 317.3 (31.9%)   |
| Re-0.13Sn     | 312.1 (21.4%)                        | 315.0 (52.5%)   | 317.5 (26.1%)   |
| Re-0.54Sn     | 312.1 (22.8%)                        | 315.1 (57.8%)   | 316.4 (19.4%)   |

<sup>a</sup> The percentage of peak area.

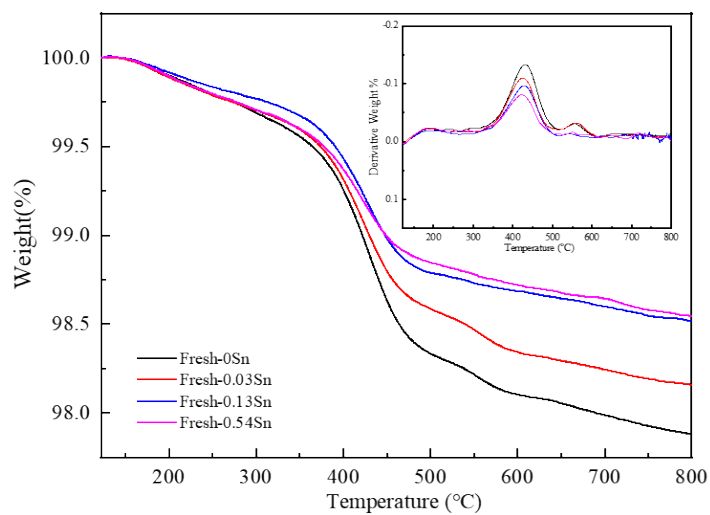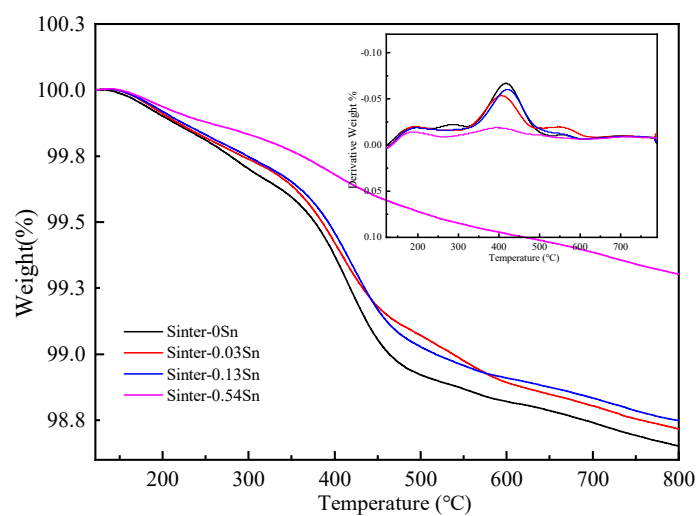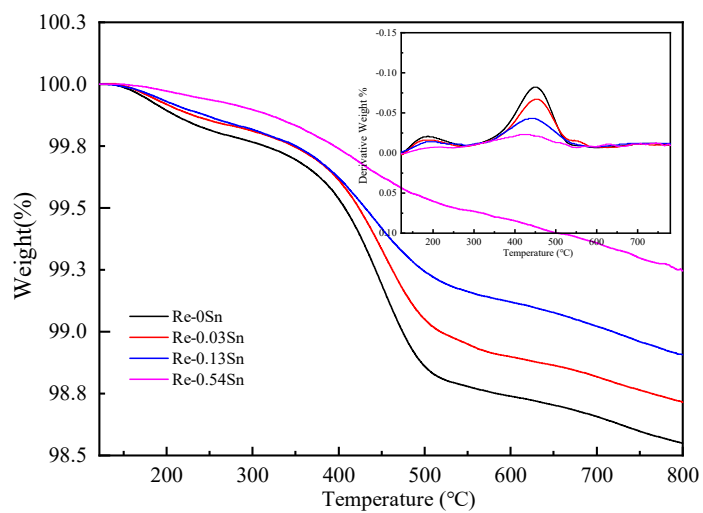

Figure S1 TG and DTG curves of fresh, sintered and regenerate catalysts.

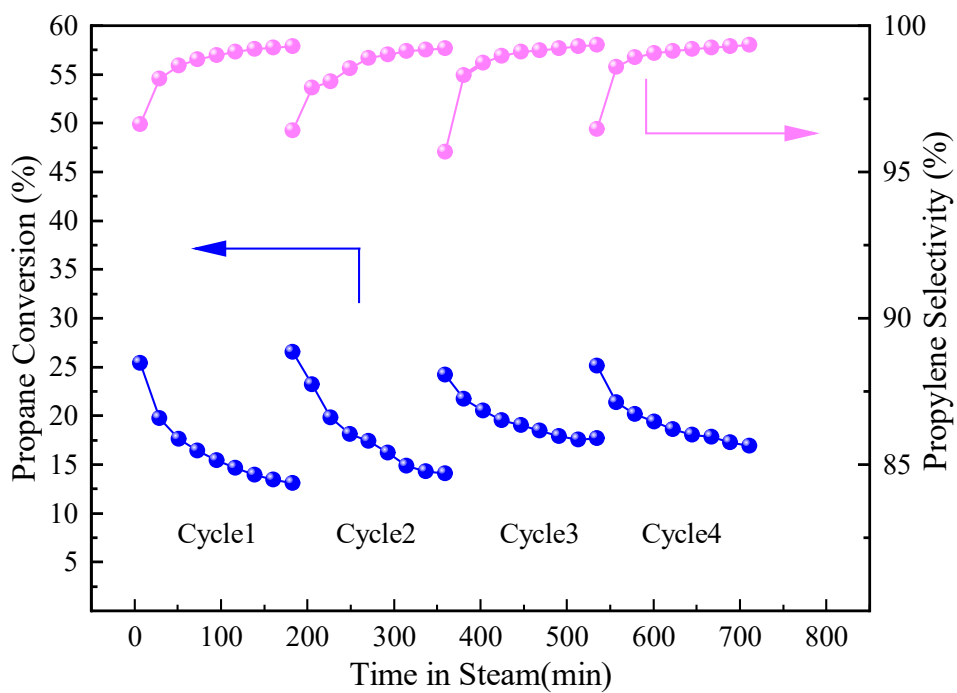

Fig S2 Evaluation catalytic propane dehydrogenation performance of Re-0.03/Al<sub>2</sub>O<sub>3</sub> in reaction-calcination- oxychlorination cycles.

Table S2 The content of Cl on different samples

| sample        | Cl content (wt%) |
|---------------|------------------|
| Fresh-0.13Sn  | 1.05             |
| Fresh-0.54Sn  | 1.11             |
| Sinter-0.13Sn | 1.09             |
| Sinter-0.54Sn | 0.98             |
| Re-0.54Sn     | 1.07             |
